# Supplementary material
Source: MDPI journal article supplement (https://www.mdpi.com/2073-445X/10/2/181)
Supplement: s1 [file s1]

## Supplementary Material

**Table S1:** Scoring for SDGs with a moderate likelihood of interaction with biomass supply chains for modern bioenergy

| SDG                                  | Target(s)                             | Linked with         | Score | Category          | Interactions Identified                                                                                                                                                                                                               | Supporting Literature |
|--------------------------------------|---------------------------------------|---------------------|-------|-------------------|---------------------------------------------------------------------------------------------------------------------------------------------------------------------------------------------------------------------------------------|-----------------------|
| <b>1. No poverty</b>                 | Poverty & Development (1.1, 1.2, 1.4) | All – supply or use | +2    | Co-benefit        | Access to modern (bio)energy is fundamental to human development and can free up resources for other productive uses. Jobs and opportunities related to bioenergy and biomass supply can reduce poverty.                              | [1–3]                 |
|                                      |                                       | All-supply or use   | -1    | Safeguard         | Large-scale biomass demand for bioenergy may promote concentration of income and/or increase poverty if appropriate policies and governance are not in place.                                                                         |                       |
|                                      | Exposure & Vulnerability (1.5)        | All- use            | +1    | Co-benefit        | Well-designed bioenergy infrastructure using local fuels can directly improve resilience of communities to disasters, related disruptions in supply of imported fuels.                                                                | [4–6]                 |
|                                      |                                       | Forest              | +2    | Co-benefit        | Forest biomass can be sourced from forest fire management efforts, directly reducing vulnerability to increasing wildfires because of climate change.                                                                                 | [7–9]                 |
|                                      |                                       | Ag. residue         | +1    | Co-benefit        | Having a secondary revenue stream from crop land can help to hedge against crop losses due to disasters, may still produce biomass even if crop itself is lost.                                                                       | [10]                  |
|                                      | Reduce Poverty (1.1, 1.2)             | Waste               | +1    | Driver/co-benefit | In developing countries, biogas may replace more expensive cooking fuels (particularly liquefied petroleum gas) and digestate can be used as fertilizer, reducing overall household expenditures. Waste generally is a low-cost fuel. | [11]                  |
| <b>3. Good health and well-being</b> | Air & Soil Pollution (3.9)            | All- use            | +2    | Co-benefit        | Modern bioenergy equipment can reduce health risks and mortality related to contamination air pollution and indoor smoke when replacing diesel, fuel oil, kerosene or traditional biomass.                                            | [2,3,11–14]           |
|                                      |                                       | Energy crop         | +1    | Co-benefit        | Energy crops can remove pollution (e.g. particulate matter, NO <sub>x</sub> , SO <sub>x</sub> ) from the atmosphere and water, and remove heavy metals from soil.                                                                     | [15–17]               |
|                                      |                                       |                     | -1    | Safeguard         | Pesticides, fertilizer and fossil fuels used to grow and harvest energy crops could increase soil, water and air pollution.                                                                                                           |                       |
|                                      |                                       | Waste               | -1    | Safeguard         | Incineration of waste may increase air pollution and soil contamination. Digestate can be high in heavy metals and must be properly dealt with.                                                                                       | [18,19]               |

| SDG                           | Target(s)                                      | Linked with       | Score | Category          | Interactions Identified                                                                                                                                                                                                                                                                                                                                                                                                                                        | Supporting Literature |
|-------------------------------|------------------------------------------------|-------------------|-------|-------------------|----------------------------------------------------------------------------------------------------------------------------------------------------------------------------------------------------------------------------------------------------------------------------------------------------------------------------------------------------------------------------------------------------------------------------------------------------------------|-----------------------|
| 6. Clean water and sanitation | Water Quantity & Quality (6.3, 6.4)            | Forest            | +1    | Co-benefit        | Areas could be reforested, or left as forest, in order to supply biomass. Depending on species of tree and location, this could have a positive impact on regional water levels and quality.                                                                                                                                                                                                                                                                   | [20]                  |
|                               |                                                |                   | -1    | Safeguard         | If forest biomass harvest and cultivation practices are carried out unsustainably (e.g. excessive fertilizer or pesticide application) or too close to a water body, there could be a negative impact on water quality.                                                                                                                                                                                                                                        |                       |
|                               |                                                | Waste             | +1    | Co-benefit        | Waste streams (e.g. leachate, manure) may be diverted from water bodies to capture energy potential.                                                                                                                                                                                                                                                                                                                                                           | [18,21]               |
|                               |                                                |                   | -1    | Safeguard         | Incineration and other waste to energy (WTE) facilities can cause soil and water pollution through leaching, similar to landfills.                                                                                                                                                                                                                                                                                                                             | [18,19]               |
|                               | Water & Related Ecosystems (6.3, 6.4, 6.6)     | Ag. residue       | -2    | Safeguard         | Indiscriminate removal of residues can increase runoff and soil erosion, impacting the quality of nearby bodies of water. Evapotranspiration may increase and ability of soil to retain water may decrease, therefore increasing the need for water inputs. Impacts from residue removal depend on local factors including soil type, topography, and climate.                                                                                                 | [22,23]               |
|                               |                                                |                   | +2    | Driver/Co-benefit | Energy crops may filter pollutants, reduce runoff, or even treat wastewater, particularly if planted on degraded land or to replace annual agriculture crops, thereby improving water quality and helping to protect important ecosystems.                                                                                                                                                                                                                     | [15,16,24,25]         |
|                               |                                                | Energy crop       | -2    | Safeguard         | Planting energy crops could increase evapotranspiration or use of water for irrigation, leading to the overuse of freshwater and ground water resources, particularly if forests or other natural ecosystems are displaced. Pesticides and fertilizers applied to energy crops may make it into bodies of water, and cause ecotoxicity.                                                                                                                        |                       |
|                               |                                                |                   |       |                   |                                                                                                                                                                                                                                                                                                                                                                                                                                                                |                       |
| 10. Reduced inequalities      | Empowerment & Equalization (10.1, 10.2)        | All-supply or use | +1    | Co-benefit        | Development of decentralized bioenergy systems, particularly in developing regions and rural towns, improves local economic opportunities for low-income populations and can enable a more democratic and participatory approach to management of energy and resources. Impacts are amplified when biomass supply is local. If land access is improved to supply local bioenergy system, empowerment and equalization of marginalized populations is possible. | [10,26–28]            |
|                               |                                                |                   | -1    | Safeguard         | If land is taken from marginalized populations to supply large scale bioenergy and biofuel facilities, this reinforces, or ‘locks-in’, current structures of unequal distribution of power and resources.                                                                                                                                                                                                                                                      |                       |
|                               | Assistance to Least Developed Countries (10.b) | All- use          | +1    | Enabler           | Increased foreign assistance to developing countries may enable development and improvement of energy infrastructure, including bioenergy and enhanced cookstoves.                                                                                                                                                                                                                                                                                             | [2]                   |

| SDG                                           | Target(s)                                                | Linked with        | Score | Category          | Interactions Identified                                                                                                                                                                                                                                                                                                           | Supporting Literature |
|-----------------------------------------------|----------------------------------------------------------|--------------------|-------|-------------------|-----------------------------------------------------------------------------------------------------------------------------------------------------------------------------------------------------------------------------------------------------------------------------------------------------------------------------------|-----------------------|
| <b>11. Sustainable cities and communities</b> | More Sustainable, Inclusive Cities (11.3)                | All- use           | +1    | Driver/Co-benefit | Decentralized bioenergy can be a part of a sustainable urbanization plan that promotes efficient use of local resources, reduces per capita fossil fuel consumption, lowers the emissions impacts of energy generation and enables local participation in energy generation and resource management.                              | [4,28,30,31]          |
|                                               | Urban-Rural Linkages (11.a)                              | All-supply         | +1    | Co-benefit        | Rural development and job creation can be supported by development of urban bioenergy infrastructure supplied by biomass from rural areas.                                                                                                                                                                                        | [32–35]               |
|                                               | Regional Planning, Support for Cities (11.a, 11.b, 11.c) | All-supply or use  | +1    | Enabler           | Regional planning may lead to support for rural biomass provision for urban energy. Improved policies around resource efficiency and disaster risk planning, as well as financial support for sustainable development and use of local materials in developing countries, may directly support and promote bioenergy development. | [26,36,37]            |
|                                               | Safe, Affordable Housing (11.1)                          | Forest             | +1    | Co-benefit        | A market for biomass could increase the competitiveness of lumber production in some regions and potentially result in lower or more stable lumber costs.                                                                                                                                                                         | [38,39]               |
|                                               | Air Quality (11.6)                                       | Forest/Ag. Residue | +1    | Co-benefit        | Crop residue or slash pile burning, and fire risk may be reduced surrounding communities if residues are used for energy in modern bioenergy technology with emissions controls; local air quality could be improved.                                                                                                             | [10,20,40–42]         |
|                                               |                                                          | Energy crop        | +1    | Co-benefit        | Planting energy crops close to urban centers or peri-urban centers could help improve air and water quality and reduce heat island effects.                                                                                                                                                                                       | [43]                  |
|                                               | Environmental Impact of Cities (11.3, 11.6)              | Waste              | +1    | Co-benefit        | If waste streams are diverted to energy, more may be collected, and higher proportion may be adequately dealt with. Land requirements for landfills may be reduced if waste is used for energy.                                                                                                                                   | [18,19,21]            |

**Table S2.** Scoring for SDGs with a low likelihood of interaction with biomass supply chains

| SDG                         | Target(s)                                      | Linked with         | Score | Category   | Interactions Identified                                                                                                                                                                                                                                          | Supporting Literature |
|-----------------------------|------------------------------------------------|---------------------|-------|------------|------------------------------------------------------------------------------------------------------------------------------------------------------------------------------------------------------------------------------------------------------------------|-----------------------|
| <b>4. Quality education</b> | Access to Education (4.1, 4.3)                 | All – supply or use | +1    | Enabler    | Quality education in a society increases its human capital. Knowledge and skills can be drawn upon to promote sustainable development, creating conditions where alternative energy sources, including bioenergy, is more likely to be explored and implemented. | [2,13,16,44]          |
|                             |                                                |                     |       | Co-benefit | Programs developed to train operators and managers of (community-based) bioenergy systems and local supply chains can lead to more opportunities for apprenticeships and technical training.                                                                     |                       |
| <b>5. Gender equality</b>   | Women's Safety & Worth (5.1, 5.4)              | All- use            | +2    | Co-benefit | Cleaner cooking fuels and modern technologies can reduce health risks related to indoor smoke and wood fuel collection faced disproportionately by women.                                                                                                        | [3,11,14,16,18]       |
|                             | Equal Land & Resources for Women (5.a)         | All-supply          | +1    | Co-benefit | Bioenergy projects could improve women's access to land and resources if planning and governance is inclusive and/or done at community scale.                                                                                                                    | [16,44]               |
|                             |                                                |                     | -1    | Safeguard  | Large-scale bioenergy projects and increased demand for biomass could potentially lead to changes that deny women, who have fewer and/or weaker land rights and access to other productive resources than men, control of high-value land.                       |                       |
|                             | Women's Workload (5.4)                         | Ag. Residue/ Waste  | +1    | Co-benefit | Using crop residues or waste to produce bioenergy for home or on-farm use can reduce labour required for crop processing, again a task typically carried out by women.                                                                                           | [11,18,19]            |
| <b>14. Life below water</b> | Ocean Eutrophication Acidification (14.1,14.3) | All - supply or use | +1    | Co-benefit | Growing biomass sustainably can help sequester carbon while reducing overall GHG emission when used in bioenergy systems. This can lead to reduced acidification of oceans and seas.                                                                             | [2,16,44]             |
|                             |                                                | All – supply or use | -1    | Safeguard  | If deployment of bioenergy increases nutrient pollution and GHG emissions, rates of ocean eutrophication and acidification will be increased.                                                                                                                    |                       |
|                             | Reduce Marine Pollution (14.1)                 | Waste               | +1    | Co-benefit | Waste streams may be diverted from oceans or seas if used for energy.                                                                                                                                                                                            | [18]                  |

| SDG                                        | Target(s)                                                | Supply chain        | Score | Category | Interactions Identified                                                                                                                                                                                                                                                                                                    | Supporting Literature |
|--------------------------------------------|----------------------------------------------------------|---------------------|-------|----------|----------------------------------------------------------------------------------------------------------------------------------------------------------------------------------------------------------------------------------------------------------------------------------------------------------------------------|-----------------------|
| <b>16. Peace, justice and institutions</b> | Effective Institutions, Governance (16.6, 16.7, 16.8)    | All - supply        | +1    | Enabler  | The existence of effective, accountable institutions, inclusive, participatory decision-making and increased participation of developing countries in global governance increases the likelihood that proper safeguards are in place to ensure sustainable biomass supply.                                                 | [2,44]                |
|                                            | Participatory Governance (16.7)                          | All - use           | +1    | Enabler  | Development of locally governed, community-scale bioenergy projects may lead to increase opportunities for participation in local decision-making.                                                                                                                                                                         | [2,4,45]              |
| <b>17. Partnerships for the goals</b>      | Cooperative Agreements, Multi-Stakeholders (17.6, 17.16) | All - supply or use | +1    | Enabler  | Because of the complexities of many bioenergy supply chains, partnerships and co-operative agreements are often formed to ensure projects are successful. Bioenergy projects often involve multiple stakeholders.                                                                                                          | [2,44,46,47]          |
|                                            | Domestic Resource Mobilization                           | All - supply or use | +1    | Enabler  | Biomass used for energy is sometimes sourced domestically and can displace imported/domestic fossil fuels. With local bioenergy, money spent on energy remains within the community/region, as opposed to most money spent on fossil energy that leaves the region. Increased jobs, industry also lead to new tax revenue. | [4,48]                |

**Table S3:** Case study summary

| Case # | Case Study Title and Description                                                         | Status | Continent | Biomass<br>Type | End Use       | SDG |   |   |   |   |   |   |   |   |    |    |    |    |    |    |
|--------|------------------------------------------------------------------------------------------|--------|-----------|-----------------|---------------|-----|---|---|---|---|---|---|---|---|----|----|----|----|----|----|
|        |                                                                                          |        |           |                 |               | 1   | 2 | 3 | 4 | 5 | 6 | 7 | 8 | 9 | 10 | 11 | 12 | 13 | 14 | 15 |
| 1      | <b>Sustainable Biogas in China:</b> On farm chicken manure for biogas production.        | I      | AS        | W               | Electricity   | X   | X |   |   |   |   | X | X | X |    |    | X  |    |    |    |
| 2      | <b>Energy From Straw in China:</b> Power production from straw.                          | S      | AS        | AR              | Electricity   |     | X |   |   |   |   | X | X | X |    | X  |    |    |    |    |
| 3      | <b>Biogas from Farm Crops in Italy:</b> Double-cropping farming for biogas production.   | I      | EU        | EC              | Electricity   | X   | X |   |   |   |   | X |   | X |    |    |    |    |    | X  |
| 4      | <b>Agroforestry Management in Sweden:</b> Willow cops for wastewater filtration.         | I      | EU        | EC              | CHP           |     |   |   |   |   | X | X | X |   |    |    |    |    |    | X  |
| 5      | <b>Wood Chip Boilers in Switzerland:</b> Wood processing residues for district heating.  | I      | EU        | F               | District heat |     |   |   |   |   |   | X | X | X |    | X  | X  |    |    |    |
| 6      | <b>Wood Chip Heat in the Netherlands:</b> Wood from agriculture land maintenance.        | I      | EU        | AR              | District heat |     |   |   |   |   |   | X | X | X |    | X  |    | X  |    |    |
| 7      | <b>Straw-based Heating in Denmark:</b> Agriculture residues as district heating fuel.    | I      | EU        | AR              | District heat |     | X |   |   |   |   | X | X | X |    | X  |    |    |    |    |
| 8      | <b>Wood Residue-based Power in Sweden:</b> Large scale urban biomass CHP plant.          | I      | EU        | F               | CHP           |     |   |   |   |   |   | X | X | X |    | X  | X  |    |    | X  |
| 9      | <b>Agriculture Residue Bio-Hub in Austria:</b> Fuel pellets from agriculture residues.   | I      | EU        | AR              | Process heat  |     | X |   |   |   |   | X | X |   |    |    | X  |    |    |    |
| 10     | <b>Agriculture Residues for Gasification in France:</b> Winery residues used for energy. | I      | EU        | AR              | Process heat  |     |   |   |   |   |   | X | X | X |    |    | X  | X  |    |    |
| 11     | <b>Agriculture Residues for Pellets in France:</b> Residues from animal feed production. | P      | EU        | AR              | Process heat  |     |   |   |   |   |   | X | X | X |    |    | X  |    |    |    |
| 12     | <b>Agro-prunings for Energy in Italy:</b> Olive tree pruning residues used in CHP.       | P      | EU        | AR              | CHP           |     | X |   |   |   |   | X | X |   |    |    | X  | X  |    |    |
| 13     | <b>Biowert Grass Biorefinery in Germany:</b> Biogas from 'grass juice' by-product.       | I      | EU        | W               | CHP           |     |   |   |   |   | X | X | X |   |    | X  | X  |    |    |    |

| Case # | Case Study Title and Description                                                             | Status | Continent | Biomass | End Use        | SDG |   |  |   |  |   |   |   |   |  |   |   |   |   |
|--------|----------------------------------------------------------------------------------------------|--------|-----------|---------|----------------|-----|---|--|---|--|---|---|---|---|--|---|---|---|---|
|        |                                                                                              |        |           |         |                |     |   |  |   |  | X | X |   | X |  |   |   |   |   |
| 14     | <b>Algae Cultivation for Biofuels in the United States:</b> Low-water growing system.        | P      | NA        | EC      | Transport fuel |     |   |  |   |  | X | X |   | X |  |   |   |   |   |
| 15     | <b>Grass Intercropping for Biofuels the United States:</b> Joint plantation with pines.      | S      | NA        | EC      | Transport fuel |     |   |  |   |  | X | X |   |   |  |   | X |   |   |
| 16     | <b>Introduction of Switchgrass for Biofuels in the US:</b> Crops converted to improve water. | S      | NA        | EC      | Transport fuel |     | X |  |   |  | X | X |   |   |  |   |   |   |   |
| 17     | <b>Perennial Intercropping for Conservation in the US:</b> Switchgrass integrated with crop. | P      | NA        | EC      | Transport fuel |     | X |  | X |  | X | X |   | X |  |   |   |   |   |
| 18     | <b>Bioenergy Crops as Riparian Buffer Zones in the United States:</b> To protect watersheds. | S      | NA        | EC      | Liquid fuel    |     | X |  |   |  | X | X |   | X |  |   |   |   |   |
| 19     | <b>Living Snow Fences in the United States:</b> Willow trees as highway snow barriers.       | S      | NA        | EC      | N/A            |     |   |  |   |  |   | X | X | X |  |   | X | X |   |
| 20     | <b>Wood Pellet Supply Chain in the United States:</b> Wood pellets for global export.        | I      | NA        | F       | Electricity    |     |   |  |   |  |   | X | X | X |  |   | X |   | X |
| 21     | <b>Wood Residue Biorefinery in Canada:</b> Wood and harvest residue for biofuel.             | P      | NA        | F       | Liquid fuel    |     |   |  |   |  |   | X | X | X |  |   | X |   | X |
| 22     | <b>Forest Management for Energy Chips in Canada:</b> Biomass from stand improvement.         | I      | NA        | F       | Building heat  |     |   |  | X |  |   | X | X | X |  | X | X |   | X |
| 23     | <b>Indigenous Wood Pellets in Canada:</b> Wood residue distribution center.                  | I      | NA        | F       | Building heat  |     |   |  | X |  |   | X | X | X |  |   |   | X | X |
| 24     | <b>Indigenous Wood-Chips in Canada:</b> Wood chip production from fire-killed trees.         | I      | NA        | F       | District heat  |     |   |  | X |  | X | X | X | X |  |   |   | X |   |
| 25     | <b>Wood Pellets in Canada:</b> Wood pellets for commercial building heating systems.         | I      | NA        | F       | Building heat  |     |   |  |   |  |   | X | X | X |  |   | X |   | X |
| 26     | <b>Tree-Crop System for Biomass in Australia:</b> Alley crops to improve water.              | S      | OC        | EC      | N/A            |     | X |  |   |  | X | X |   |   |  |   |   |   | X |
| 27     | <b>Indigenous Land Design in Australia:</b> Restoring degraded land with energy crops.       | S      | OC        | EC      | N/A            |     |   |  |   |  |   | X |   |   |  |   |   | X | X |
| 28     | <b>On-farm Biogas Production in Australia:</b> Pig manure for biogas.                        | I      | OC        | W       | Electricity    |     | X |  |   |  |   | X |   | X |  |   | X |   |   |

| Case # | Case Study Title and Description                                                            | Status | Continent | Biomass | End Use        | SDG |   |   |   |   |   |   |   |   |   |  |   |   |   |
|--------|---------------------------------------------------------------------------------------------|--------|-----------|---------|----------------|-----|---|---|---|---|---|---|---|---|---|--|---|---|---|
|        |                                                                                             |        |           |         |                |     |   |   |   |   |   |   |   |   |   |  |   |   |   |
| 29     | <b>Sugarcane Biofuel Production in Brazil:</b> Improving water use in biofuel production.   | I      | SA        | EC      | Transport fuel |     |   |   |   |   | X | X |   |   |   |  |   | X |   |
| 30     | <b>On-Farm Biogas Production in Brazil:</b> Upgrading biogas from manure to fuels.          | I      | SA        | W       | Transport fuel | X   | X |   |   |   | X | X | X |   |   |  | X |   |   |
| 31     | <b>Biogas from Sugarcane in Brazil:</b> Biogas from vinasse - sugarcane byproduct.          | I      | SA        | W       | Electricity    |     |   |   |   |   | X | X |   |   |   |  | X |   |   |
| 32     | <b>Agriculture Residue for Energy in Kenya:</b> Food production residue for process energy. | I      | AF        | AR      | CHP            | X   | X |   |   |   |   | X |   | X |   |  | X |   |   |
| 33     | <b>Bioenergy from Sugarcane Residues in South Africa:</b> Gaging potential bioenergy.       | S      | AF        | AR      | Electricity    |     | X |   |   |   |   | X | X | X | X |  |   |   |   |
| 34     | <b>Agroforestry for Food in Zambia:</b> Intercropping for food and energy security.         | I      | AF        | EC      | Building heat  |     | X |   | X | X |   | X |   |   |   |  | X |   | X |
| 35     | <b>Agriculture Briquettes in Tanzania:</b> Briquette production from rice husks.            | I      | AF        | AR      | Building heat  |     | X |   |   |   |   | X |   |   |   |  | X |   | X |
| 36     | <b>Renewable Energy Technologies in Gahan:</b> Female led biofuel initiative.               | I      | AF        | AR      | Process heat   | X   |   | X |   | X |   | X |   |   |   |  | X |   |   |
| 37     | <b>Biomass Pellets in Rwanda:</b> Promoting biomass pellet use and new cook stove use.      | I      | AF        | F       | Building heat  |     |   | X |   |   |   | X | X |   |   |  | X |   | X |

## References

- (1) McCollum, D. L.; Gomez Echeverri, L.; Busch, S.; Pachauri, S.; Parkinson, S.; Rogelj, J.; Krey, V.; Nilsson, M.; Stevance, A.-S.; Riahi, K. Connecting the Sustainable Development Goals by Their Energy Inter-Linkages. *Environ. Res. Lett.* **2018**, *13*.
- (2) Rosenthal, J.; Quinn, A.; Grieshop, A. P.; Pillarsetti, A.; Glass, R. I. Clean Cooking and the SDGs: Integrated Analytical Approaches to Guide Energy Interventions for Health and Environment Goals. *Energy Sustain. Dev.* **2018**, *42*, 152–159. <https://doi.org/10.1016/j.esd.2017.11.003>.
- (3) Surendra, K. C.; Takara, D.; Hashimoto, A. G.; Khanal, S. K. Biogas as a Sustainable Energy Source for Developing Countries: Opportunities and Challenges. *Renew. Sustain. Energy Rev.* **2014**, *31*, 846–859. <https://doi.org/10.1016/j.rser.2013.12.015>.
- (4) Blair, M. J.; Mabee, W. E. Evaluation of Technology , Economics and Emissions Impacts of Community-Scale Bioenergy Systems for a Forest-Based Community in Ontario. *Renew. Energy* **2019**, *151*, 715-730. <https://doi.org/10.1016/j.renene.2019.11.073>.
- (5) Gubbins, N. The Role of Community Energy Schemes in Supporting Community Resilience. **2010**.



- (6) Hicks, J.; Ison, N. Community-Owned Renewable Energy (CRE): Opportunities for Rural Australia. *Rural Soc.* **2011**, *20* (3), 244–255. <https://doi.org/10.5172/rsj.20.3.244>.
- (7) Saul, D.; Newman, S.; Peterson, S.; Kosse, E.; Jacobson, R.; Keefe, R.; Devadoss, S.; Laninga, T.; Moroney, J. Evaluation of Three Forest-Based Bioenergy. **2018**, *116*, 497–504. <https://doi.org/10.1093/jofore/fvy042>.
- (8) Dale, V. H.; Parish, E.; Kline, K. L.; Tobin, E. How Is Wood-Based Pellet Production Affecting Forest Conditions in the Southeastern United States? *For. Ecol. Manage.* **2017**, *396*, 143–149. <https://doi.org/10.1016/j.foreco.2017.03.022>.
- (9) Kadam, K. L.; Wooley, R. J.; Aden, a; Nguyen, Q. a; Yancey, M. a; Ferraro, F. M. Softwood Forest Thinnings as a Biomass Source for Ethanol Production: A Feasibility Study for California. *Biotechnol. Prog.* **2002**, *16* (6), 947–957. <https://doi.org/10.1021/bp000127s>.
- (10) Singh, J. Overview of Electric Power Potential of Surplus Agricultural Biomass from Economic, Social, Environmental and Technical Perspective - A Case Study of Punjab. *Renew. Sustain. Energy Rev.* **2015**, *42*, 286–297. <https://doi.org/10.1016/j.rser.2014.10.015>.
- (11) Gosens, J.; Lu, Y.; He, G.; Bluemling, B.; Beckers, T. A. M. Sustainability Effects of Household-Scale Biogas in Rural China. *Energy Policy* **2013**, *54*, 273–287. <https://doi.org/10.1016/j.enpol.2012.11.032>.
- (12) Eisentraut, A.; Brown, A. *Heating without Global Warming: Market Development and Policy Considerations for Renewable Heat*; 2014.
- (13) Rahman, R. Feasibility Analysis of Wood-Biomass Energy Generation for the off-Grid Community of Brochet in North-West Manitoba , Canada, University of Manitoba, 2014.
- (14) Mazorra, J.; Sánchez-Jacob, E.; de la Sota, C.; Fernández, L.; Lumbreras, J. A Comprehensive Analysis of Cooking Solutions Co-Benefits at Household Level: Healthy Lives and Well-Being, Gender and Climate Change. *Sci. Total Environ.* **2020**, *707*. <https://doi.org/10.1016/j.scitotenv.2019.135968>.
- (15) Müller, A.; Weigelt, J.; Götz, A.; Schmidt, O.; Lobos Alva, I.; Matuschke, I.; Ehling, U.; Beringer, T. *The Role of Biomass in the Sustainable Development Goals: A Reality Check and Governance Implications*; Potsdam, 2015.
- (16) IEA Bioenergy. *Examples of Positive Bioenergy and Water Relationships*; GBEP & IEA Bioenergy, 2016. <https://doi.org/10.13140/RG.2.1.1304.6166>.
- (17) Meers, E.; Van Slycken, S.; Adriaensen, K.; Ruttens, A.; Vangronsveld, J.; Du Laing, G.; Witters, N.; Thewys, T.; Tack, F. M. G. The Use of Bio-Energy Crops (Zea Mays) for “phytoattenuation” of Heavy Metals on Moderately Contaminated Soils: A Field Experiment. *Chemosphere* **2010**, *78* (1), 35–41. <https://doi.org/10.1016/j.chemosphere.2009.08.015>.
- (18) AlQattan, N.; Acheampong, M.; Jaward, F. M.; Ertem, F. C.; Vijayakumar, N.; Bello, T. Reviewing the Potential of Waste-to-Energy (WTE) Technologies for Sustainable Development Goal (SDG) Numbers Seven and Eleven. *Renew. Energy Focus* **2018**, *27* (December), 97–110. <https://doi.org/10.1016/j.ref.2018.09.005>.
- (19) Khan, I.; Kabir, Z. Waste-to-Energy Generation Technologies and the Developing Economies: A Multi-Criteria Analysis for Sustainability Assessment. *Renew. Energy* **2020**, *150*, 320–333. <https://doi.org/10.1016/j.renene.2019.12.132>.
- (20) Berndes, G.; Cowie, A.; Pelkmans, L. *The Use of Forest Biomass for Climate Change Mitigation: Dispelling Some Misconceptions*; 2020; Vol. 11.
- (21) Johari, A.; Ahmed, S. I.; Hashim, H.; Alkali, H.; Ramli, M. Economic and Environmental Benefits of Landfill Gas from Municipal Solid Waste in Malaysia. *Renew. Sustain. Energy Rev.* **2012**, *16* (5), 2907–2912. <https://doi.org/10.1016/j.rser.2012.02.005>.

- (22) Blanco-Canqui, H.; Lal, R. Crop Residue Removal Impacts on Soil Productivity and Environmental Quality. *CRC. Crit. Rev. Plant Sci.* **2009**, *28* (3), 139–163. <https://doi.org/10.1080/07352680902776507>.
- (23) IEA Bioenergy. *Mobilisation of Agricultural Residues for Bioenergy and Higher Value Bio-Products: Resources, Barriers and Sustainability*; 2017.
- (24) Cook, J.; Beyea, J. *An Analysis of the Environmental Impacts of Energy Crops in the USA: Methodologies, Conclusions and Recommendations*; Washinton, DC, 2009.
- (25) Nilsson, M.; Griggs, D.; Visbeck, M. Policy: Map the Interactions between Sustainable Development Goals. *Nature* **2016**, *534* (7607), 320–322. <https://doi.org/10.1038/534320a>.
- (26) Forbord, M.; Vik, J.; Hillring, B. G. Development of Local and Regional Forest Based Bioenergy in Norway - Supply Networks, Financial Support and Political Commitment. *Biomass and Bioenergy* **2012**, *47*, 164–176. <https://doi.org/10.1016/j.biombioe.2012.09.045>.
- (27) Zabaniotou, A. Redesigning a Bioenergy Sector in EU in the Transition to Circular Waste-Based Bioeconomy-A Multidisciplinary Review. *J. Clean. Prod.* **2018**, *177*, 197–206. <https://doi.org/10.1016/j.jclepro.2017.12.172>.
- (28) Wüste, A.; Schmuck, P. Bioenergy Villages and Regions in Germany: An Interview Study with Initiators of Communal Bioenergy Projects on the Success Factors for Restructuring the Energy Supply of the Community. *Sustainability* **2012**, *4*, 244–256. <https://doi.org/10.3390/su4020244>.
- (29) Buchholz, T. S.; Volk, T. a.; Luzadis, V. a. A Participatory Systems Approach to Modeling Social, Economic, and Ecological Components of Bioenergy. *Energy Policy* **2007**, *35* (12), 6084–6094. <https://doi.org/10.1016/j.enpol.2007.08.020>.
- (30) Marciano, J. a; Lilieholm, R. J.; Teisl, M. F.; Leahy, J. E.; Neupane, B. Factors Affecting Public Support for Forest-Based Biorefineries: A Comparison of Mill Towns and the General Public in Maine, USA. *Energy Policy* **2014**, *75*, 301–311. <https://doi.org/10.1016/j.enpol.2014.08.016>.
- (31) Joseph, C.; Krishnaswamy, A. Factors of Resiliency for Forest Communities in Transition in British Columbia. *Management* **2010**, *10* (3), 127–144.
- (32) Crandall, M. S.; Adams, D. M.; Montgomery, C. A.; Smith, D. The Potential Rural Development Impacts of Utilizing Non-Merchantable Forest Biomass. *For. Policy Econ.* **2017**, *74*, 20–29. <https://doi.org/10.1016/j.forpol.2016.11.002>.
- (33) Albert, S. Transition to a Forest Bio-Economy: A Community Development Strategy Discussion. *J. Rural Community Dev.* **2007**.
- (34) Jackson, R. W.; Neto, A. B. F.; Erfanian, E. Woody Biomass Processing : Potential Economic Impacts on Rural Regions. *Energy Policy* **2018**, *115* (January), 66–77. <https://doi.org/10.1016/j.enpol.2018.01.001>.
- (35) Islam, M. N.; Campus, G. Community Led Renewable Energy and Its Impact on Rural Development : A Content Analysis. **2016**.
- (36) Issa, I.; Delbruck, S.; Hamm, U. Bioeconomy from Experts' Perspectives – Results of a Global Expert Survey. *PLoS One* **2019**, *14* (5), 1–22.
- (37) Cardoso, T. F.; Watanabe, M. D. B.; Souza, A.; Chagas, M. F.; Cavalett, O.; Morais, E. R.; Nogueira, L. A. H.; Leal, M. R. L. V; Braunbeck, O. A.; Cortez, L. A. B.; Bonomi, A.; Nacional, L.; Ciência, D.; Ctbe, B.; Nacional, C.; Pesquisa, D.; Cnpem, M. A Regional Approach to Determine Economic , Environmental and Social Impacts of Different Sugarcane Production Systems in Brazil. *Biomass and Bioenergy* **2019**, *120* (October 2018), 9–20. <https://doi.org/10.1016/j.biombioe.2018.10.018>.
- (38) Levin, R.; Krigstin, S.; Wetzel, S. Biomass Availability in Eastern Ontario for Bioenergy and Wood Pellet Initiatives. *For. Chron.* **2011**, *87* (1), 33–41.
- (39) Krigstin, S.; Hayashi, K.; Tchórzewski, J.; Wetzel, S. Current Inventory and Modelling of Sawmill Residues in Eastern Canada. *For. Chron.* **2012**, *88*.
- (40) Ralevic, P.; Ryans, M.; Cormier, D. Assessing Forest Biomass for Bioenergy : Operational Challenges and Cost Considerations 1. *For. Chron.* **2010**, *86* (1), 18–21.

- (41) Bentsen, N. S.; Jørgensen, J. R.; Stupak, I.; Jørgensen, U.; Taghizadeh-Toosi, A. Dynamic Sustainability Assessment of Heat and Electricity Production Based on Agricultural Crop Residues in Denmark. *J. Clean. Prod.* **2019**, *213*, 491–507. <https://doi.org/10.1016/j.jclepro.2018.12.194>.
- (42) Ter-Mikaelian, M. T.; Colombo, S. J.; Lovekin, D.; McKechnie, J.; Reynolds, R.; Titus, B.; Laurin, E.; Chapman, A.-M.; Chen, J.; MacLean, H. L. Carbon Debt Repayment or Carbon Sequestration Parity? Lessons from a Forest Bioenergy Case Study in Ontario, Canada. *GCB Bioenergy* **2014**, No. APRIL, n/a-n/a. <https://doi.org/10.1111/gcbb.12198>.
- (43) Keoleian, G. A.; Volk, T. A. Renewable Energy from Willow Biomass Crops: Life Cycle Energy, Environmental and Economic Performance. *CRC. Crit. Rev. Plant Sci.* **2005**, *24* (5–6), 385–406. <https://doi.org/10.1080/07352680500316334>.
- (44) San Juan, M. G.; Bogdanski, A.; Dubois, O. *Towards Sustainable Bioeconomy*; 2019.
- (45) Majumdar, I.; Campbell, K. A.; Maure, J.; Saleem, I.; Halasz, J.; Mutton, J. *Forest Bioeconomy in Ontario – A Policy Discussion*; 2017; Vol. 93. <https://doi.org/10.5558/tfc2017-007>.
- (46) Hagadone, T. a.; Grala, R. K. Business Clusters in Mississippi’s Forest Products Industry. *For. Policy Econ.* **2012**, *20*, 16–24. <https://doi.org/10.1016/j.forpol.2012.01.011>.
- (47) Näyhä, A.; Pesonen, H.-L. Strategic Change in the Forest Industry towards the Biorefining Business. *Technol. Forecast. Soc. Change* **2014**, *81*, 259–271. <https://doi.org/10.1016/j.techfore.2013.04.014>.
- (48) Stephen, J.; Cecil-Cockwell, M. *Heat: Ontario’s Opportunity to Rebuild the Forest Sector, Ensure Economic Resiliency, and Reduce Greenhouse Gas Emissions* Jamie Stephen, PhD & Malcolm Cecil-Cockwell, RPF November; 2018.
